# Supplementary material for: Physico-Mechanical Performances of Mortars Prepared with Sorted Earthquake Rubble: The Role of CDW Type and Contained Crystalline Phases
Source: Materials (Basel). 2023 Apr 3;16(7):2855. doi: 10.3390/ma16072855 (PMC10096024; doi:10.3390/ma16072855)
Supplement: Supplementary file 1 [file materials-16-02855-s001.zip › Supplementary tables.xlsx]

## Sheet: Table S1
	Table S1. CDW samples investigated by XRPD plus their mesoscopic features.
	CDW type	Label	Colour		Mesoscopic texture
			Bulk	Powder
	RA-NS-100	NS1	whitish to greyish to ochre	whitish to greyish to ochre	aphanitic to porphyric
		NS2
		NS3
		NS4
		NS5
	RA-CO-100	CO1	greyish	greyish	porphyric
		CO2
		CO3
		CO4
		CO5
		CO6
	RA-TI-100	RT1	whitish to greyish to brownish	whitish to greyish to brownish	aphanitic
		RT2
		RT3
		RT4
		RT5
	RA-BR-100	BR1	reddish	reddish	porphyric
		BR2
		BR3
	RA-PF-100	PF1	brownish	brownish	aphanitic
		PF2
		PF3
		PF4
	RA-RT-100	RT1	brownish	brownish	aphanitic
		RT2
		RT3
		RT4
		RT5
	Footnotes: aphanitic texture refers to undetectable mesoscopic phases with sizes below some hundreds of μm;
	porphyric texture corresponds to phaneritic phases that are visible by naked eye or an optical lens (10 X)
	with sizes above some hundreds of μm dispersed in an aphanitic matrix.

## Sheet: Table S2
	Table S2. Standard guidelines and facilities for the determination
	of physical and mechanical prop-257 erties of aggregates and mortars.
	Parameter	Reference	Standard
	Aggregate volumetric mass (density) and water absorption	EN 1097-6	ASTM E1404 - 94
	Compressive strength	EN 12390-3	ASTM C 349 - 18
	Flexural strength	EN 12390-6	ASTM C 348 - 20
	Ultrasonic pulse velocity (UPV)	EN 12504-4	ASTM C597 - 16
	Electrical resistivity	UNE 83988-2	AASHTO TP 95
	Dynamic modulus of elasticity	EN 12680-1	ASTM-E1876- 15

## Sheet: Table S3
	Table S3. Shrinkage as a function of time for mortars.
	Label	Shrinkage at 14 days (μm/m)	σ	ΔA0	Shrinkage at 28 days (μm/m)	σ	ΔA0	Shrinkage at 91 days (μm/m)	σ	ΔA0
	RVAM-NS-50	-596.0	23.5	0.01	-876.1	18.4	0.02	-932.5	22.0	0.03
	RAM-NS-100	-642.5	17.0	0.08	-943.8	31.7	0.09	-998.5	25.4	0.1
	RVAM-CO-50	-618.6	11.8	0.05	-919.9	19.4	0.07	-972.7	23.0	0.07
	RAM-CO-100	-730.1	34.4	0.19	-1026.8	16.3	0.17	-1082.2	22.6	0.17
	RVAM-TI-50	-702.9	12.7	0.16	-955.0	31.7	0.11	-1025.8	32.6	0.12
	RAM-TI-100	-777.2	30.0	0.24	-1048.6	38.4	0.19	-1089.9	30.1	0.17
	RVAM-BR-50	-789.4	23.8	0.25	-1092.5	9.8	0.22	-1172.5	9.3	0.23
	RAM-BR-100	-943.5	55.4	0.38	-1404.4	49.6	0.39	-1421.0	49.0	0.37
	RVAM-PF-50	-732.1	14.3	0.2	-1003.8	33.9	0.15	-1077.1	22.1	0.16
	RAM-PF-100	-932.3	32.2	0.37	-1212.2	18.9	0.3	-1232.8	16.8	0.27
	RVAM-RT-50	-722.1	28.2	0.19	-974.7	24.6	0.12	-1041.4	20.6	0.13
	RAM-RT-100	-795.4	92.5	0.26	-1107.6	60.2	0.23	-1174.7	67.6	0.23
	Footnotes: The shrinkage is obtained averaging three measurements; ΔA0 indicates the variation referred to RM.

## Sheet: Table S4
	Table S4. Compressive strength as a function of time for mortars.
	Label	compressive strength at 7 days (MPa)	σ	ΔA0	compressive strength at 28 days (MPa)	σ	ΔA0
	RM	49.0	2.0	-	58.9	2.8	-
	RVAM-NS-50	45.4	1.8	-0.07	54.8	0.9	-0.07
	RAM-NS-100	43.3	3.8	-0.12	53.1	3.2	-0.1
	RVAM-CO-50	44.5	2.3	-0.09	52.5	1.2	-0.11
	RAM-CO-100	42.3	1.5	-0.14	47.6	1.7	-0.19
	RVAM-TI-50	43.5	1.9	-0.11	49.3	3.3	-0.16
	RAM-TI-100	41.2	2.0	-0.16	47.0	1.7	-0.2
	RVAM-BR-50	41.7	2.0	-0.15	47.6	1.9	-0.19
	RAM-BR-100	37.9	4.8	-0.23	41.8	2.5	-0.29
	RVAM-PF-50	43.9	2.8	-0.1	49.0	2.2	-0.17
	RAM-PF-100	40.4	3.5	-0.18	45.6	2.0	-0.23
	RVAM-RT-50	44.3	2.4	-0.1	47.5	1.5	-0.19
	RAM-RT-100	40.2	3.0	-0.18	43.4	2.9	-0.26
	Footnotes: The compressive strength is obtained averaging three measurements; ΔA0 indicates the variation referred to RM.

## Sheet: Table S5
	Table S5. Flexural strength as a function of time for mortars.
	Label	flexural strength at 7 days (MPa)	σ	ΔA0	flexural strength at 28 days (MPa)	σ	ΔA0
	RM	6.3	0.1	-	8.1	0.3	-
	RVAM-NS-50	5.9	0.1	-0.06	7.7	0.2	-0.05
	RAM-NS-100	5.7	0.1	-0.09	7.4	0.1	-0.08
	RVAM-CO-50	5.6	0.0	-0.11	7.6	0.1	-0.06
	RAM-CO-100	5.1	0.2	-0.18	7.2	0.1	-0.12
	RVAM-TI-50	5.7	0.1	-0.09	7.3	0.1	-0.1
	RAM-TI-100	5.2	0.2	-0.17	6.7	0.2	-0.18
	RVAM-BR-50	5.0	0.1	-0.21	6.5	0.1	-0.2
	RAM-BR-100	4.2	0.1	-0.32	5.8	0.1	-0.29
	RVAM-PF-50	5.2	0.1	-0.17	6.8	0.1	-0.16
	RAM-PF-100	4.5	0.2	-0.27	6.0	0.2	-0.26
	RVAM-RT-50	5.2	0.2	-0.18	7.1	0.2	-0.12
	RAM-RT-100	4.4	0.1	-0.3	6.5	0.1	-0.2
	Footnotes: The flexural strength is obtained averaging three measurements; ΔA0 indicates the variation referred to RM.

## Sheet: Table S6
	Table S6. Ultrasonic pulse velocity test and electrical resistivity of mortars at 28 days.
	Label	Ultrasonic pulse velocity test (m/s)	σ	ΔA0	Electrical resistivity (Ω.m)	σ	ΔA0
	RM	4433.5	21.3	-	194	4.5	-
	RVAM-NS-50	4273.1	21.3	-0.04	179	3.5	-0.08
	RAM-NS-100	4118.7	25.5	-0.07	159	2.3	-0.18
	RVAM-CO-50	4385.9	56.3	-0.01	161	10.3	-0.17
	RAM-CO-100	4214.2	1.2	-0.05	139	4.5	-0.28
	RVAM-TI-50	4250.8	73.8	-0.04	169	4.9	-0.13
	RAM-TI-100	4060.3	42.5	-0.08	150	3.2	-0.23
	RVAM-BR-50	4155.7	92.4	-0.06	148	7.5	-0.24
	RAM-BR-100	3931.4	26.0	-0.11	120	4.9	-0.38
	RVAM-PF-50	4147.5	13.1	-0.06	150	1.3	-0.23
	RAM-PF-100	3893.6	16.6	-0.12	130	2.6	-0.33
	RVAM-RT-50	4090.4	84.7	-0.08	144	2.0	-0.26
	RAM-RT-100	3859.7	3.5	-0.13	122	4.0	-0.37
	Footnotes: The ultrasonic pulse velocity and electrical resistivity are obtained averaging three measurements; ΔA0 indicates the variation referred to RM.

## Sheet: Table S7
	Table S7. Dynamic modulus of elasticity of mortars at 28 days.
	Label	Dynamic modulus of elasticity (GPa)	σ	ΔA0
	RM	35.3	0.3	-
	RVAM-NS-50	32.0	0.8	-0.09
	RAM-NS-100	28.7	0.1	-0.19
	RVAM-CO-50	31.4	1.2	-0.11
	RAM-CO-100	28.3	0.3	-0.2
	RVAM-TI-50	30.4	0.5	-0.14
	RAM-TI-100	27.9	0.6	-0.21
	RVAM-BR-50	29.6	0.3	-0.16
	RAM-BR-100	23.6	0.1	-0.33
	RVAM-PF-50	29.8	0.3	-0.16
	RAM-PF-100	23.2	0.1	-0.34
	RVAM-RT-50	30.1	0.3	-0.15
	RAM-RT-100	22.9	0.3	-0.35
	Footnotes: The dynamic modulus of elasticity is obtained averaging three measurements; ΔA0 indicates the variation referred to RM.
